# Supplementary material for: Specific immobilization ofd-amino acid oxidase on hematin-functionalized support mimicking multi-enzyme catalysis
Source: Royal Society of Chemistry journal article supplement (doi:10.1039/c5gc01233c), 2015-01-01
Supplement: c5gc01233c1.pdf [file c5gc01233c1.pdf]

## Supporting information

### Specific Immobilization of D-Amino Acid Oxidase on Hematin-functionalized Support Mimicking Multi-enzyme Catalysis

Jian Sun<sup>a</sup>, Kun Du<sup>a</sup>, Xiaoqiang Song<sup>a</sup>, Qian Gao<sup>a</sup>, Hao Wu<sup>b</sup>, Jingjing Ma<sup>a</sup>, Peijun Ji<sup>b</sup>,  
Wei Feng<sup>a\*</sup>

<sup>a</sup>Department of Biochemical Engineering, <sup>b</sup>Department of Chemical Engineering,  
Beijing University of Chemical Technology, Beijing, 100029, China

*Gene constructions and cloning for an elastin-like polypeptide (ELP).* A 20-repeat polypeptide of Val-Pro-Gly-Xaa-Gly was synthesized in PUC57 plasmid by the genewiz company (Suzhou, China). (VPGXG)<sub>20</sub> was used as the monomer for synthesis of (VPGXG)<sub>60</sub> and Xaa was chosen to be Val:Ala:Gly in a 5:3:2 ratio.<sup>1</sup> The gene sequence of the monomer (VPGXG)<sub>20</sub> is listed in [Table S1](#) (see supporting information).

PUC57-(VPGXG)<sub>20</sub> was linearized with *Pfl*MI (2 μL *Pfl*MI I; 3 μL 10×K buffer; 25 μL PUC57-(VPGXG)<sub>20</sub> at at 37 °C for 3 h), enzymatically dephosphorylated with alkaline phosphatase, and then purified using a DNA extraction kit (Omega Bio-tek). Another aliquot of the plasmid was codigested with *Pfl*MI and *Bgl* I restriction endonucleases to generate the free (VPGXG)<sub>20</sub> insert (2 μL *Pfl*MI I; 2 μL *Bgl* I; 5 μL 10×K buffer; 41 μL PUC57-(VPGXG)<sub>20</sub>). After digestion, the reaction products were separated by agarose gel electrophoresis, and the insert was purified using a DNA extraction kit (Omega Bio-tek).

The monomers were then ligated to the linearized vector (0.4 μL T4 DNA ligase, 2

\* Department of Biochemical Engineering, Beijing University of Chemical Technology, Beijing, 100029, China.

E-mail: fengwei@mail.buct.edu.cn.

$\mu\text{L}$  10 $\times$ ligation buffer; 2  $\mu\text{L}$  PUC57-(VPGXG)<sub>20</sub>, 15.6  $\mu\text{L}$  insert, incubated at 22 °C for 20 min). A 10  $\mu\text{L}$  portion of the ligation mixture was combined with 100  $\mu\text{L}$  of chemically competent *Escherichia coli* cells (DH5 $\alpha$ ), and the cells were transformed by heat shock (30 min on ice, 90 s 42 °C, 3 min on ice). After addition of 900  $\mu\text{L}$  LB medium, the cells were cultured for 45 min, spread on LB medium agar plates supplemented with ampicillin (50  $\mu\text{g}/\text{mL}$ ), and incubated at 37 °C. The transformants were verified by their digestions with diagnostic restriction endonucleases and confirmed by DNA sequencing (BGI Tech). The result of this process was a (VPGXG)<sub>40</sub> insert in the pUC-57 vector. Subsequent additional round of recursive directional ligation proceed identically for (VPGXG)<sub>60</sub>. The plasmid pET28a was codigested BamH I and Hind III restriction endonucleases. The pUC-57 vector harboring the (VPGXG)<sub>60</sub> gene was codigested BamH I and Hind III restriction endonucleases, and the resulting fragment was ligated into the plasmid pET28a to construct the expression vector pET28a/(VPGXG)<sub>60</sub> in *Escherichia coli*. [Fig. S1a](#) shows the SDS-PAGE analysis for the ELP (VPGXG)<sub>60</sub> (see supporting information). The ELP was approximately 29.5 kDa in size, in agreement with the theoretically predicted molecular weight the molecular weight. The purified ELP can be reversed from a cloudy suspension to a clear solution at a low temperature (4 °C) ([Fig. S1b](#)).

*Expression vector construction.* The DAAO gene was amplified by PCR using Pfu DNA polymerase with genomic DNA of *Trigonopsis variabilis* as template using the paired primers ([Table S2](#)). The DAAO gene was purified using a DNA extraction kit (Omega Bio-tek) and was then codigested codigested Nco I and BamH I restriction endonucleases. The resulting fragment was ligated into the plasmid pET28a/(VPGXG)<sub>60</sub>, which has been codigested with Nco I and BamH I restriction endonucleases. Thus the expression vector pET28a/(VPGXG)<sub>60</sub>-DAAO in *Escherichia coli*. was constructed.

Table S1. ELP monomer

---

The gene sequence of the monomer (VPGXG)<sub>20</sub> with a restriction site of SacI at 5' terminal and a restriction site of Sall at 3' terminal

5'GGATCCGAGCTCCATATGGGCCACGGCGTGGGTGTTCCGGGCGTGGGTG  
TTCCGGGTGGCGGTGTGCCGGGCGCAGGTGTTCCCTGGTGTAGGTGTGCCG  
GGTGTGGTGTGCCGGGTGTTGGTGTACCAGGTGGCGGTGTTCCGGGTGC  
AGGCGTTCGGGTGGCGGTGTGCCGGGCGTGGGTGTTCCGGGCGTGGGTG  
TTCCGGGTGGCGGTGTGCCGGGCGCAGGTGTTCCCTGGTGTAGGTGTGCCG  
GGTGTGGTGTGCCGGGTGTTGGTGTACCAGGTGGCGGTGTTCCGGGTGC  
AGGCGTTCGGGTGGCGGTGTGCCGGGCGGGCTGGTCGACAAGCTT3'

---

Table S2. DAAO gene sequence and primers

---

ATGGCTAAAATCGTTGTTATTGGTGCCGGTGTTGCCGGTTTAACTACAGCT  
CTTCAACTTCTTCGTAAAGGACATGAGGTTACAATTGTGTCCGAGTTTACG  
CCCGGTGATCTTAGTATCGGATATACCTCGCCTTGGGCAGGTGCCAACTGG  
CTCACATTTTACGATGGAGGCAAGTTAGCCGACTACGATGCCGTCTCTTAT  
CCTATCTTGCGAGAGCTGGCTCGAAGCAGCCCCGAGGCTGGAATTGACT  
CATCAACCAACGCTCCCATGTTCTCAAGCGTGATCTTCCTAAACTGGAAGG  
TGCCATGTCGGCCATCTGTCAACGCAACCCCTGGTTCAAAAACACAGTCG  
ATTCTTTTCGAGATTATCGAGGACAGGTCCAGGATTGTCCACGATGATGTG  
GCTTATCTAGTCGAATTTGCTTCCGTTTGTATCCACACCGGAGTCTACTTG  
AACTGGCTGATGTCCCAATGCTTATCGCTCGGCGCCACGGTGGTTAAACGT  
CGAGTGAACCATATCAAGGATGCCAATTTACTACACTCCTCAGGATCACG  
CCCCGACGTGATTGTCAACTGTAGTGGTCTCTTTGCCCGGTTCTTGGGAGG  
CGTCGAGGACAAGAAGATGTACCTATTCGAGGACAAGTCGTCCTTGTTT  
GAAACTCTCTTCCTTTTATGGCCTCCTTTTCCAGCACTCCTGAAAAAGAAA  
ATGAAGACGAAGCTCTATATATCATGACCCGATTCGATGGTACTTCTATCA  
TTGGCGGTTGTTTCCAACCAACAACCTGGTCATCCGAACCCGATCCTTCTC  
TCACCCATCGAATCCTGTCTAGAGCCCTCGACCGATTCCCGGAACCTGACCA  
AAGATGGCCCTCTTGACATTGTGCGCGAATGCGTTGGCCACCGTCCTGGTA  
GAGAGGGCGGTCCCCGAGTAGAATTAGAGAAGATCCCCGGCGTTGGCTTT  
GTTGTCCATAACTATGGTGCCGCGGTGCTGGTTACCAGTCCTCTTACGGC  
ATGGCTGATGAAGCTGTTTCTTACGTCGAAAGAGCTCTTACTCGTCCAAAC  
CTT

---

The primers used for the amplification of the DAAO gene, which were designed based on the gene sequence of the DAAO (GenBank accession AY514426). The underlines indicates Nco I and BamH I restriction sites, respectively.

5'GCGCCATGGCTAAAATCGTTGTTATTG3'

5'ATGGATCCAAGGTTTGGACGAGTAAGAG3'

---

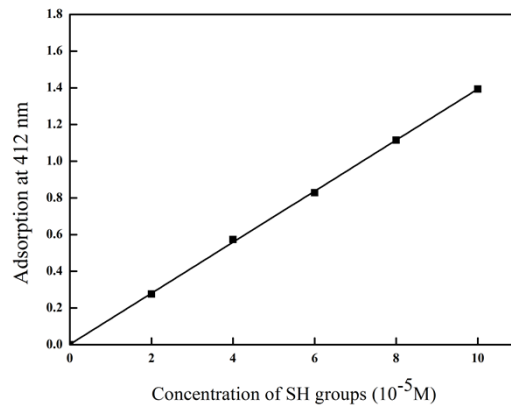

**Fig. S1. Standard curve for SH group**

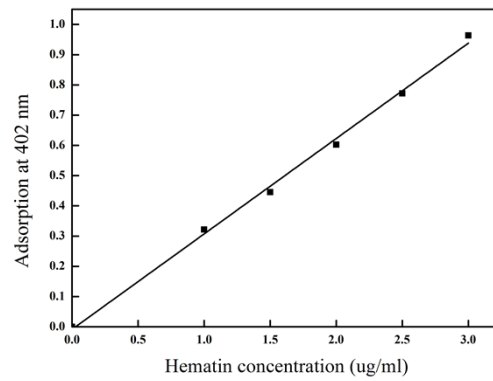

**Fig. S2. Standard curve for hematin**

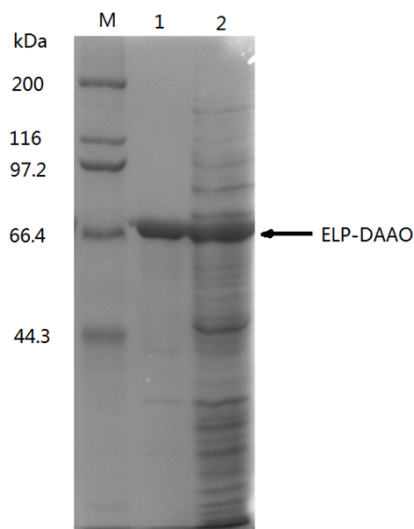

**Fig. S3. Analysis of purified ELP-DAAO by SDS-PAGE.**

Lane M: molecular mass marker (KDa); lane 1 is for the supernatants from the third round of inverse transition cycling; lane 2 is for total proteins.

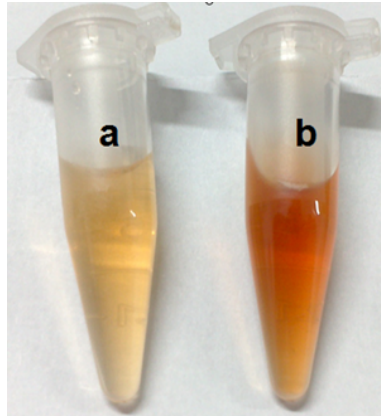

**Fig. S4. Deamination of D-alanine catalyzed by free ELP-DAAO (a) and immobilized ELP-DAAO (b).**

Reaction conditions: equivalent amount of enzyme was used, 0.1 mg/ml ELP-DAAO; D-alanine (1.30 mM) was dissolved in 1 ml PBS buffer (pH8.0, 50 mM). The reactions were carried out at 30 °C for 3 min. 200  $\mu$ l trichloroacetic acid solution (20 % w/v) was then added to the tubes to terminate the reactions. The solutions were centrifuged. 100  $\mu$ l 2,4-dinitrophenylhydrazine (DNPH) solution (10 mM) was added to the supernatants, incubated at 37 °C for 10 min, and then 700  $\mu$ l NaOH (1.5 M) was added.

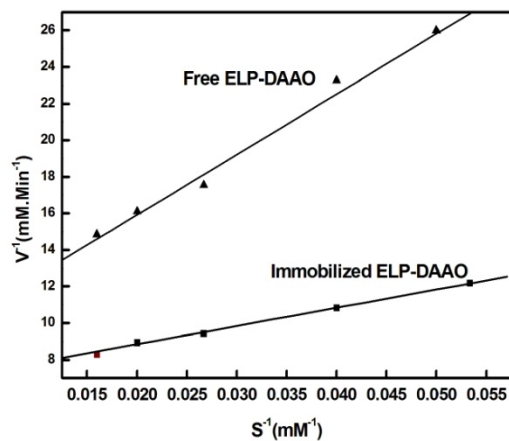

**Fig. S5. 1/Vmax versus 1/C for the free and immobilized enzymes**

The concentration of substrate ranged from 20 to 63 mM.

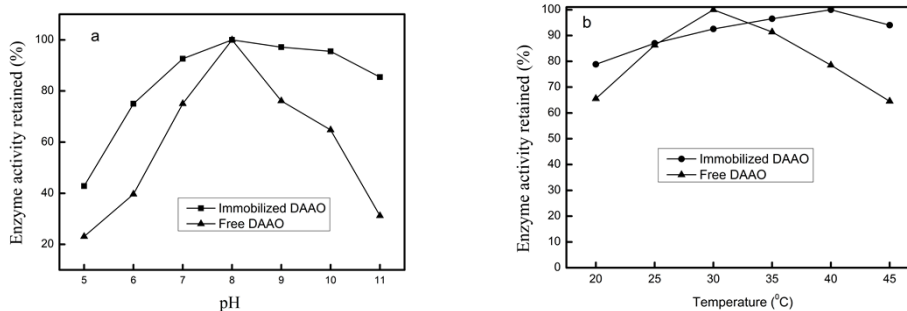

**Fig. S6. Effect of pH (a) and temperature (b) on the retaining of enzymatic**

## activity for immobilized and free enzymes

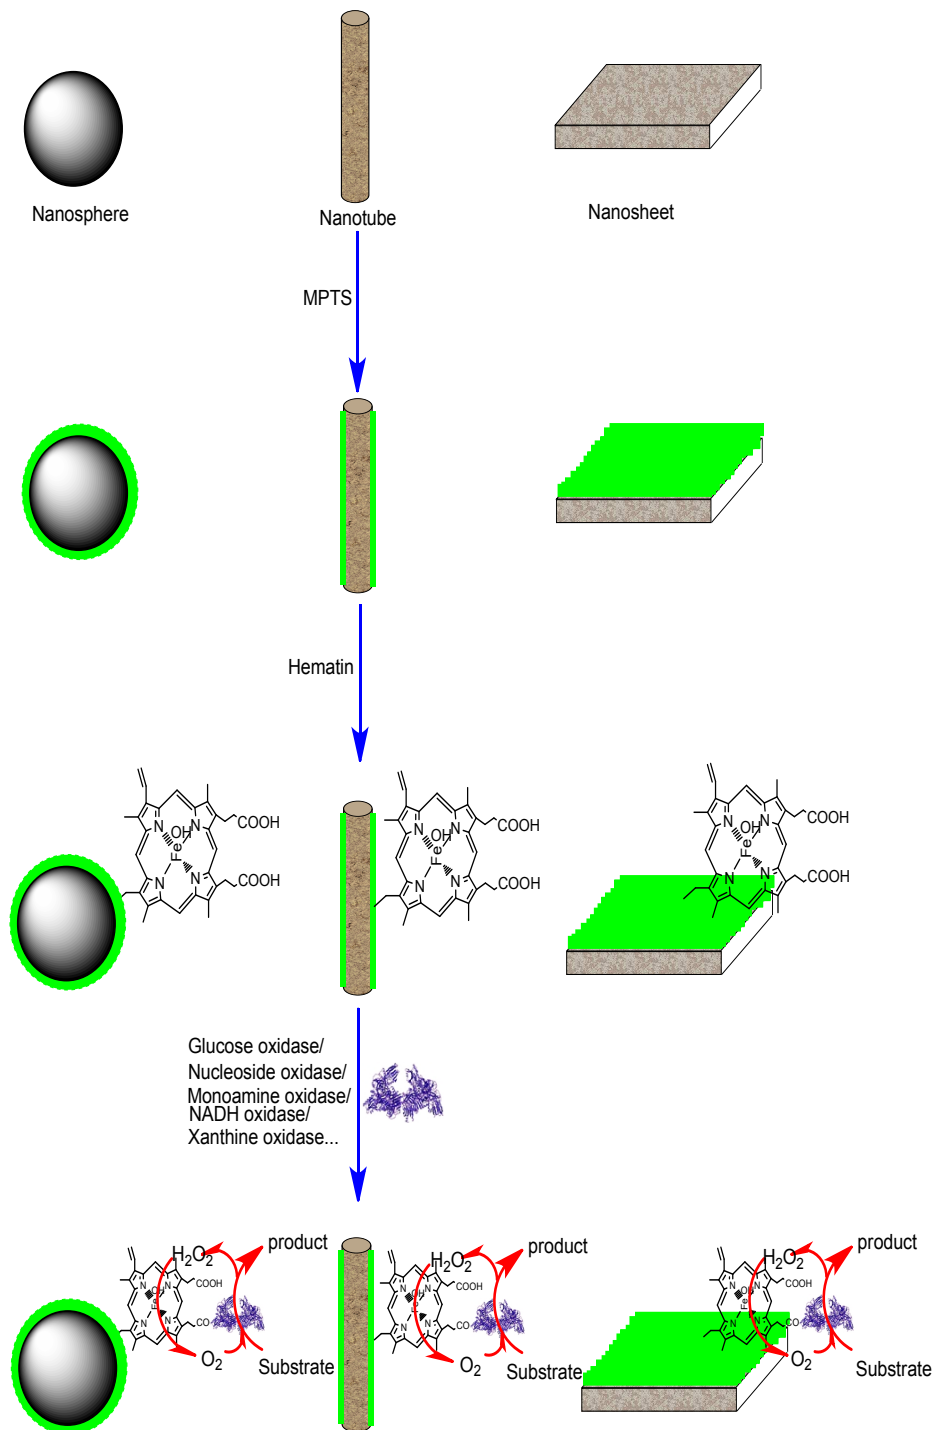

**Fig. S7. Schematic showing the extension of the enzyme immobilization methodology to oxidases and supports**

Reference

1. D. E. Meyer, A. Chilkoti, *Biomacromolecules*, 2002, **3**, 357-367
